# Supplementary material for: Effect of breakfast on weight and energy intake: systematic review and meta-analysis of randomised controlled trials
Source: PubMed Central journal article supplement — BMJ. 2019 Jan 30;364:l42. doi: 10.1136/bmj.l42 (PMC6352874; doi:10.1136/bmj.l42), 2019-01-30

**Supplementary Table 1: Search strategy for Ovid Medline**

|    |                                                                                                                                                                                                                                            |
|----|--------------------------------------------------------------------------------------------------------------------------------------------------------------------------------------------------------------------------------------------|
| 1  | exp Breakfast/ph [Physiology]                                                                                                                                                                                                              |
| 2  | morning meal.ti.                                                                                                                                                                                                                           |
| 3  | meal timing.tw.                                                                                                                                                                                                                            |
| 4  | Omitting breakfast.mp. [mp=title, abstract, original title, name of substance word, subject heading word, keyword heading word, protocol supplementary concept word, rare disease supplementary concept word, unique identifier, synonyms] |
| 5  | skipping meals.mp. [mp=title, abstract, original title, name of substance word, subject heading word, keyword heading word, protocol supplementary concept word, rare disease supplementary concept word, unique identifier, synonyms]     |
| 6  | eating habits.mp. [mp=title, abstract, original title, name of substance word, subject heading word, keyword heading word, protocol supplementary concept word, rare disease supplementary concept word, unique identifier, synonyms]      |
| 7  | eating habits.tw.                                                                                                                                                                                                                          |
| 8  | eating habits.ti.                                                                                                                                                                                                                          |
| 9  | eating patterns.ti.                                                                                                                                                                                                                        |
| 10 | 1 or 2 or 3 or 4 or 5 or 6 or 7 or 8 or 9                                                                                                                                                                                                  |
| 11 | weight loss.tw.                                                                                                                                                                                                                            |
| 12 | exp Weight Gain/ph [Physiology]                                                                                                                                                                                                            |
| 13 | Body Mass Index/ or exp Weight Loss/ or exp Obesity/ or Diet, Reducing/ or Weight Gain/                                                                                                                                                    |
| 14 | Energy intake.mp. [mp=title, abstract, original title, name of substance word, subject heading word, keyword heading word, protocol supplementary concept word, rare disease supplementary concept word, unique identifier, synonyms]      |
| 15 | energy balance.mp. [mp=title, abstract, original title, name of substance word, subject heading word, keyword heading word, protocol supplementary concept word, rare disease supplementary concept word, unique identifier, synonyms]     |
| 16 | caloric intake.mp. [mp=title, abstract, original title, name of substance word, subject heading word, keyword heading word, protocol supplementary concept word, rare disease supplementary concept word, unique identifier, synonyms]     |
| 17 | fat loss.mp. [mp=title, abstract, original title, name of substance word, subject heading word, keyword heading word, protocol supplementary concept word, rare disease supplementary concept word, unique identifier, synonyms]           |
| 18 | 11 or 12 or 13 or 17                                                                                                                                                                                                                       |
| 19 | 14 or 15 or 16                                                                                                                                                                                                                             |
| 20 | Adult/ or Obesity/ or Obes*.mp. or Obesity, Morbid/                                                                                                                                                                                        |
| 21 | 10 and 18 and 19                                                                                                                                                                                                                           |
| 22 | 1 and 21                                                                                                                                                                                                                                   |
| 23 | 20 and 21                                                                                                                                                                                                                                  |

## Supplementary Table 2: Sensitivity analyses

|                                                                                  | Random-effects meta-analysis of weight (kg) |                | Random-effects meta-analysis of total daily energy intake (kcal/d) |                |
|----------------------------------------------------------------------------------|---------------------------------------------|----------------|--------------------------------------------------------------------|----------------|
|                                                                                  | MD (95% CI)                                 | I <sup>2</sup> | MD (95% CI)                                                        | I <sup>2</sup> |
| <b>Primary analysis</b>                                                          |                                             |                |                                                                    |                |
| Estimated SE of MD in crossover trials assuming a correlation coefficient of 0.3 | 0.44 (0.07 to 0.82)                         | 43%            | 259.79 (78.87 to 440.71)                                           | 80%            |
| <b>Sensitivity analyses</b>                                                      |                                             |                |                                                                    |                |
| Estimated SE of MD in crossover trials assuming a correlation coefficient of 0.5 | 0.44 (0.06 to 0.81)                         | 43%            | 257.66 (81.45 to 433.87)                                           | 80%            |
| Estimated SE of MD in crossover trials assuming a correlation coefficient of 0.7 | 0.43 (0.06 to 0.81)                         | 43%            | 254.06 (85.60 to 422.53)                                           | 80%            |
| Estimated SE of MD in crossover trials assuming a correlation coefficient of 0.9 | 0.42 (0.04 to 0.79)                         | 45%            | 245.69 (93.12 to 398.25)                                           | 80%            |

CI = confidence interval; MD = mean difference; SE = standard error

## Supplementary figure 1: Meta-analysis of the mean difference (MD) in weight (kg) based on baseline BMI

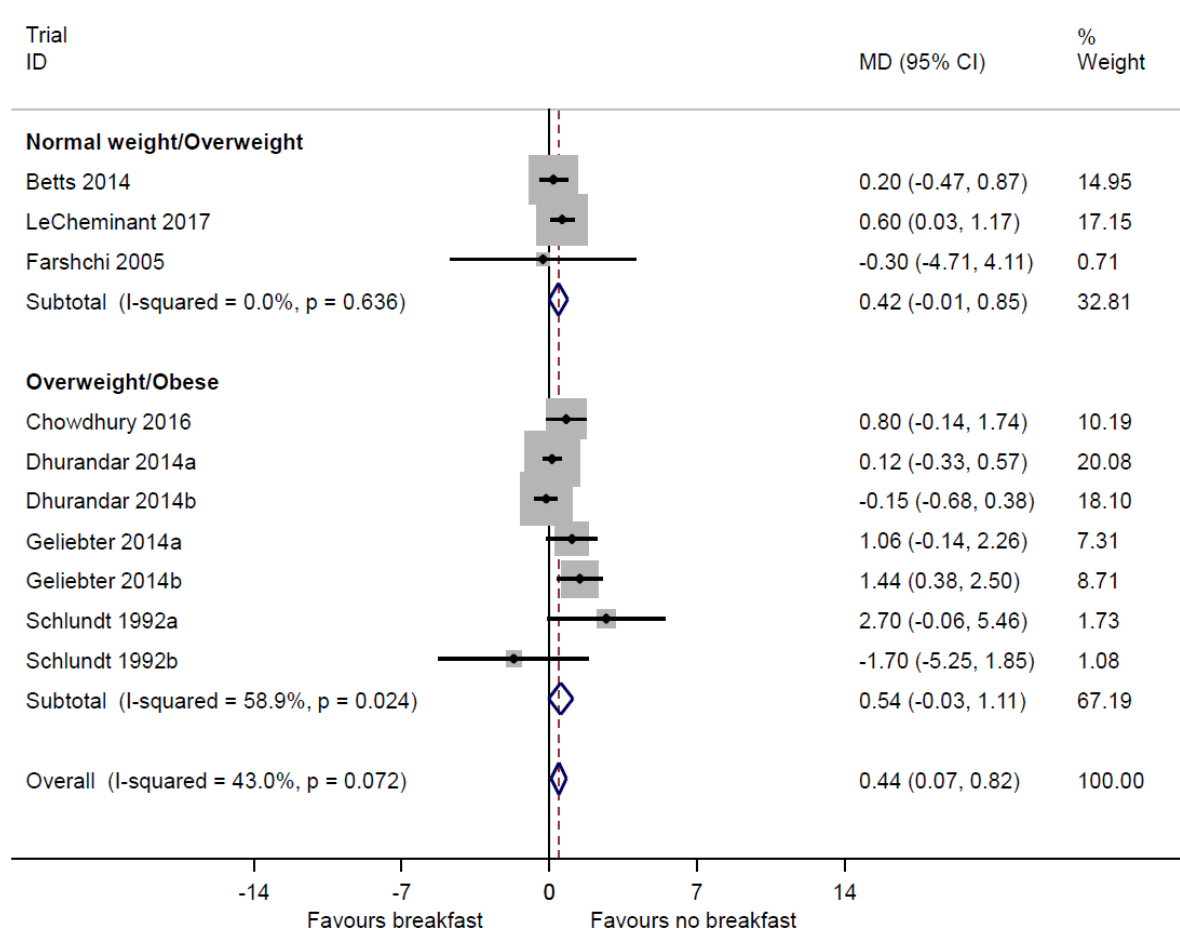

Supplement: siek045910.ww.pdf [file siek045910.ww.pdf]
