# Supplementary material for: Effect of breakfast on weight and energy intake: systematic review and meta-analysis of randomised controlled trials
Source: PubMed Central journal article supplement — BMJ. 2019 Jan 30;364:l42. doi: 10.1136/bmj.l42 (PMC6352874; doi:10.1136/bmj.l42), 2019-01-30

# GOfER diagram (Graphical Overview for Evidence Reviews)

Use this diagram to compare characteristics of the included studies and participants, evidence quality and findings

## ASSESSMENT OF EXPOSURE

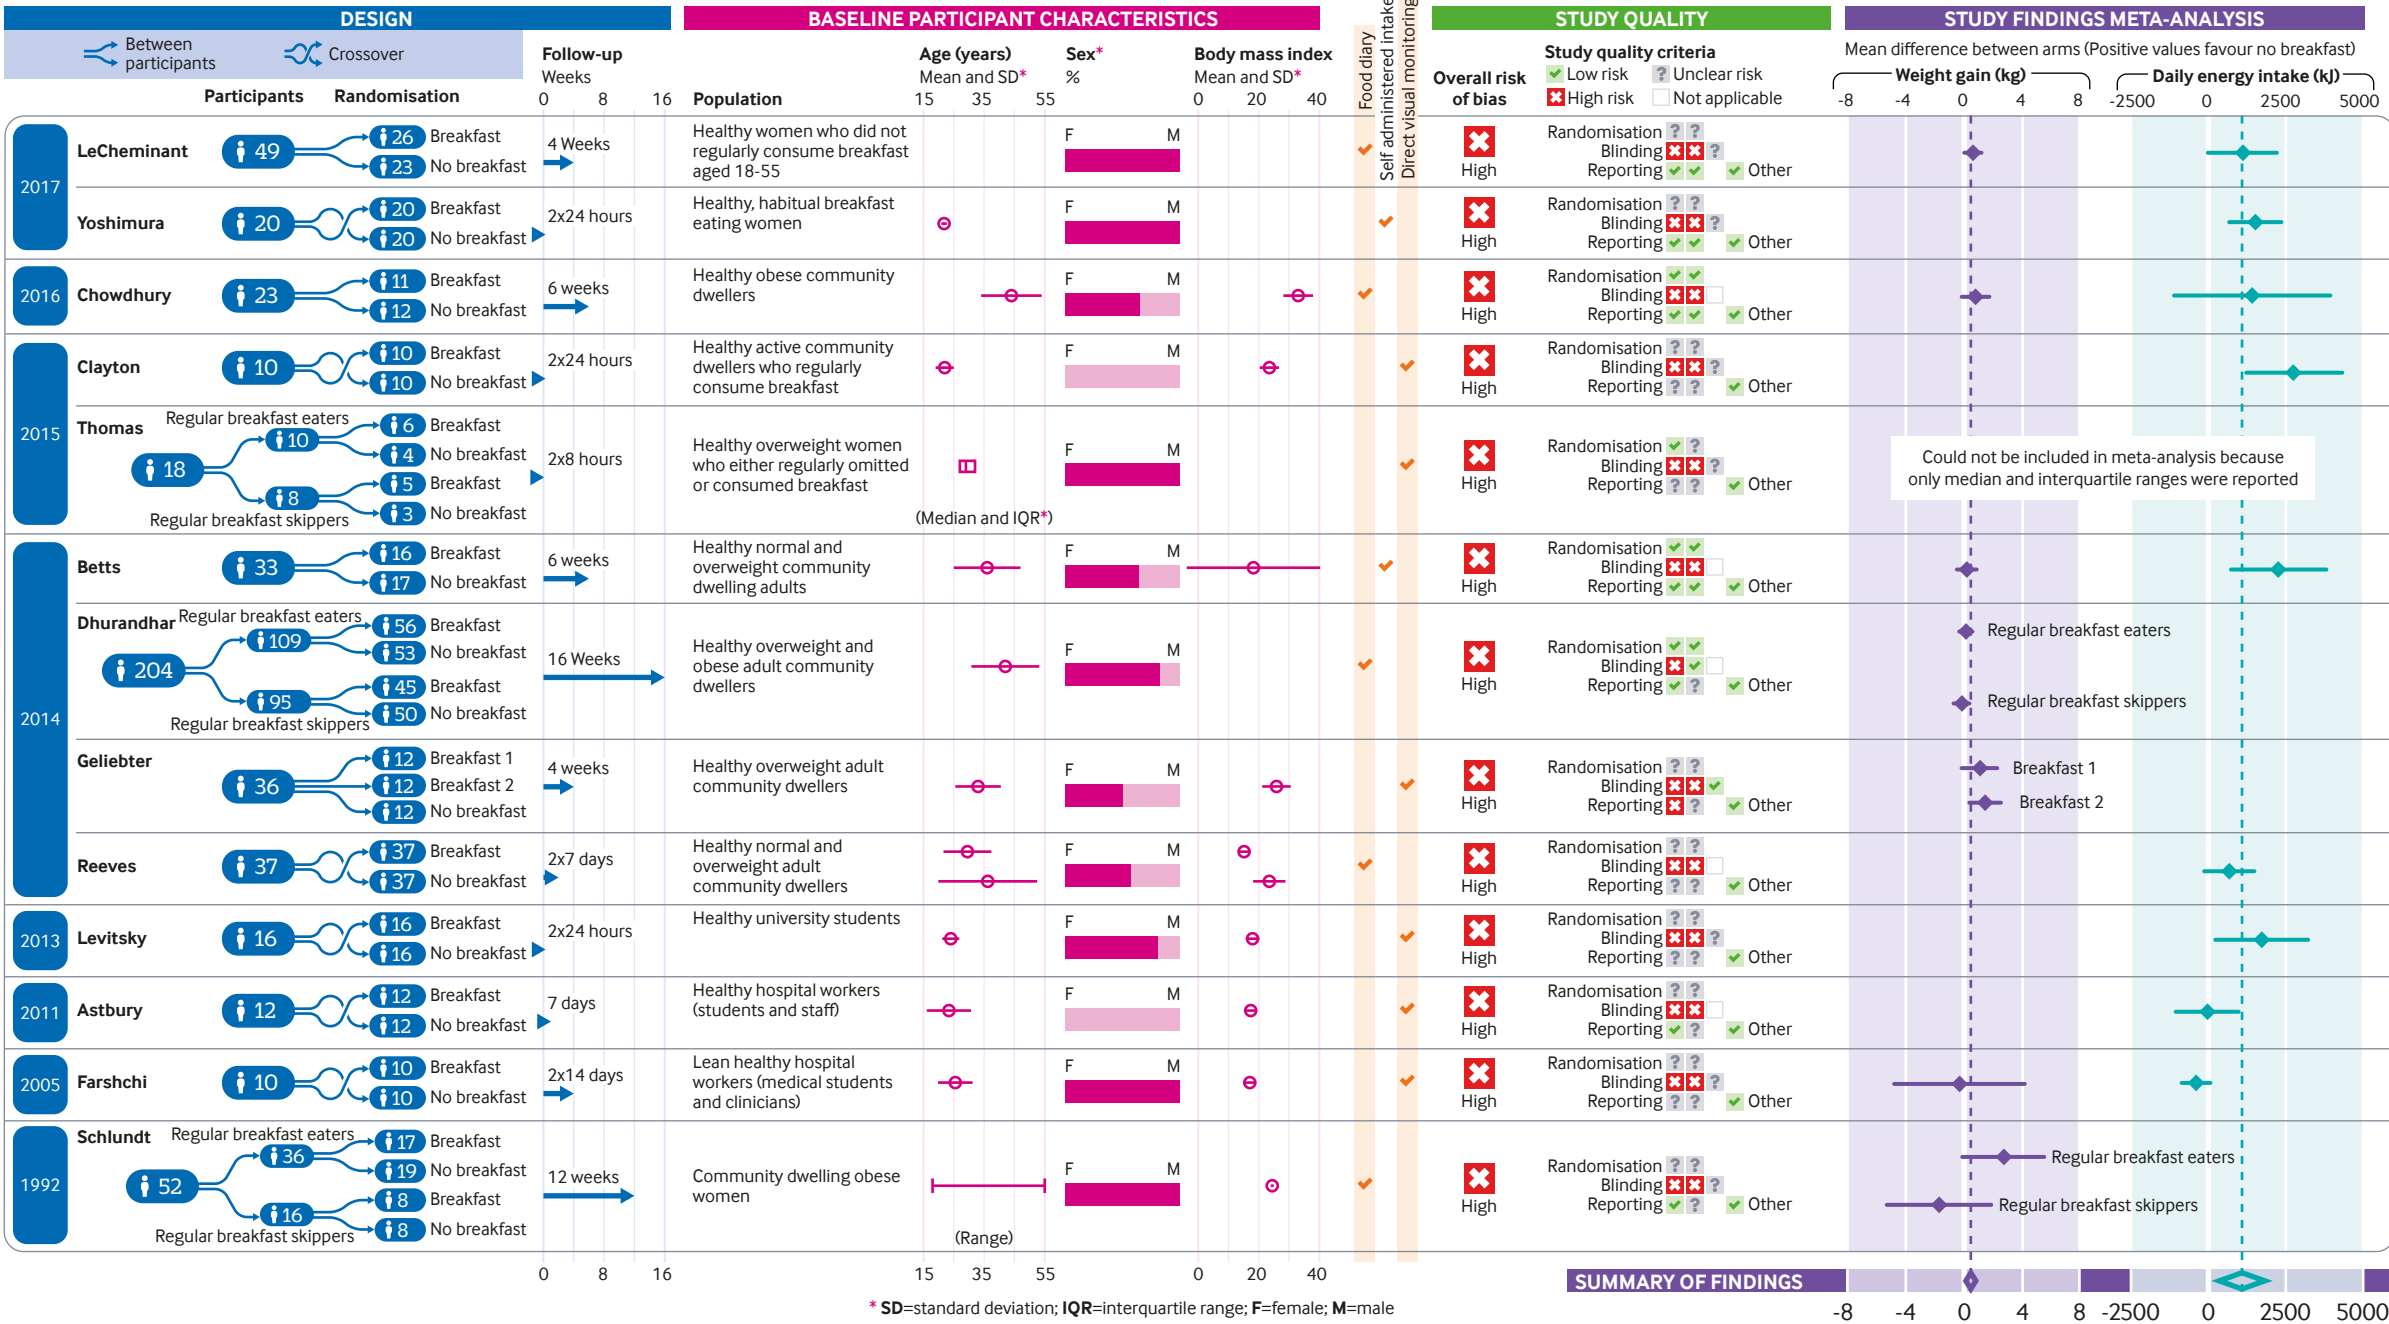

\*SD=standard deviation; IQR=interquartile range; F=female; M=male

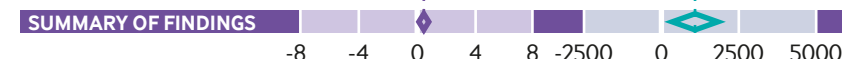

Supplement: siek045910.sf.pdf [file siek045910.sf.pdf]
